# Supplementary material for: Marijuana Use Impacts Midlife Cardiovascular Events in HIV-Infected Men
Source: PubMed Central journal article supplement — Clin Infect Dis. 2017 Apr 25;65(4):626–35. doi: 10.1093/cid/cix391 (PMC5850013; doi:10.1093/cid/cix391), 2017-04-25
Supplement: cix391_suppl_85344_supplemental_figure_1.pdf [file cix391_suppl_85344_supplemental_figure_1.pdf]

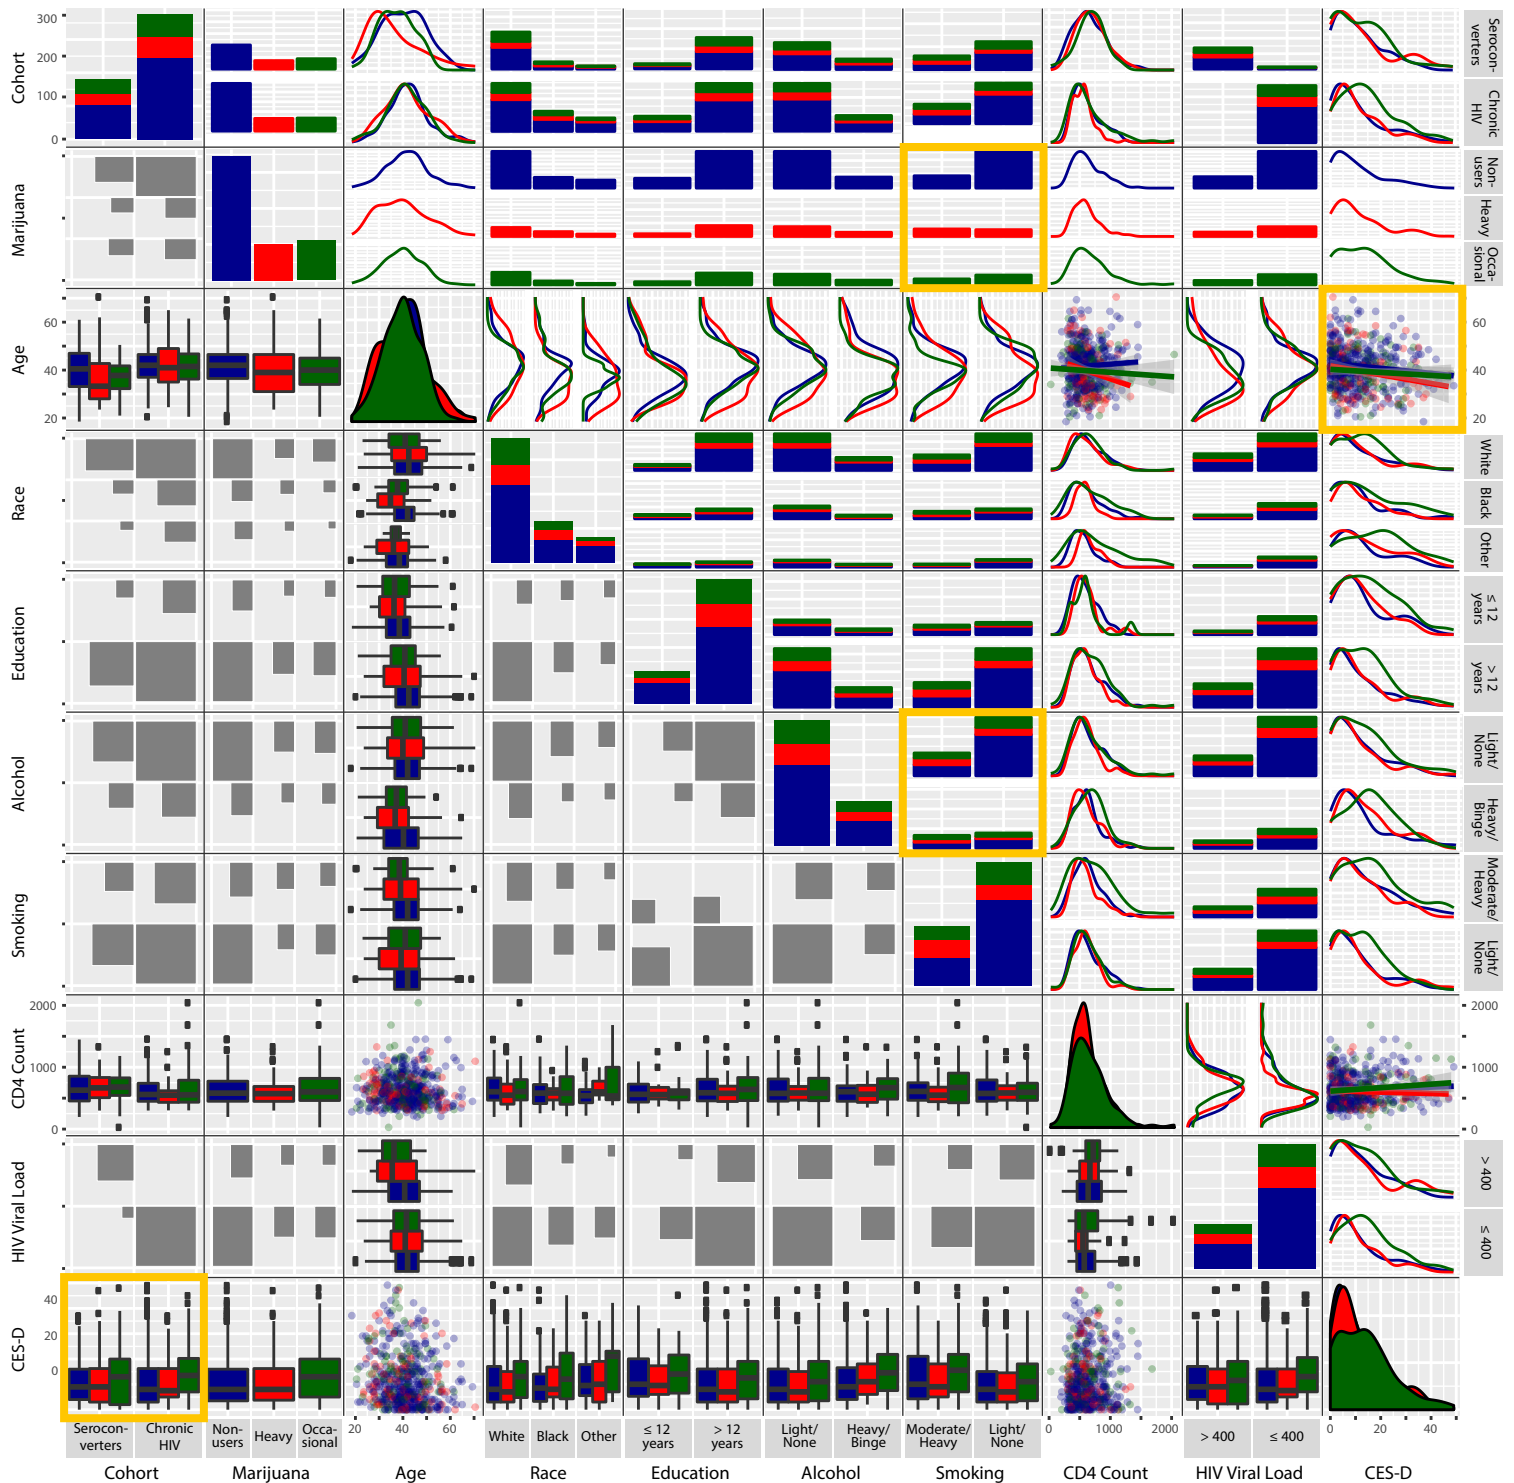

**Supplementary Figure 1. Pairwise comparisons of baseline clinical, behavioral, and demographic variables by marijuana use in the merged HIV+ cohort.** Generalized pairs plot visualizing bivariate relationships between all baseline and demographic variables (Table 1). Colors indicate marijuana use group: blue, non-users, red, heavy marijuana users, and green, occasional users. Categorical vs. categorical variable comparisons are summarized with area (lower left) or stacked bar plots (upper right) displaying proportions of subjects by group, categorical vs. continuous variable comparisons with box (lower left) or density plots (upper right), and continuous vs. continuous variable comparisons with scatter plots without (lower left) and with (upper right) linear model trend lines. Comparisons of interest noted in the text are highlighted with gold outlines. Abbreviations: CES-D, Center for Epidemiological Studies Depression Score; HIV, Human Immunodeficiency Virus.
