# Supplementary material for: Marijuana Use Impacts Midlife Cardiovascular Events in HIV-Infected Men
Source: PubMed Central journal article supplement — Clin Infect Dis. 2017 Apr 25;65(4):626–35. doi: 10.1093/cid/cix391 (PMC5850013; doi:10.1093/cid/cix391), 2017-04-25
Supplement: cix391_suppl_85344_supplemental_figure_2.pdf [file cix391_suppl_85344_supplemental_figure_2.pdf]

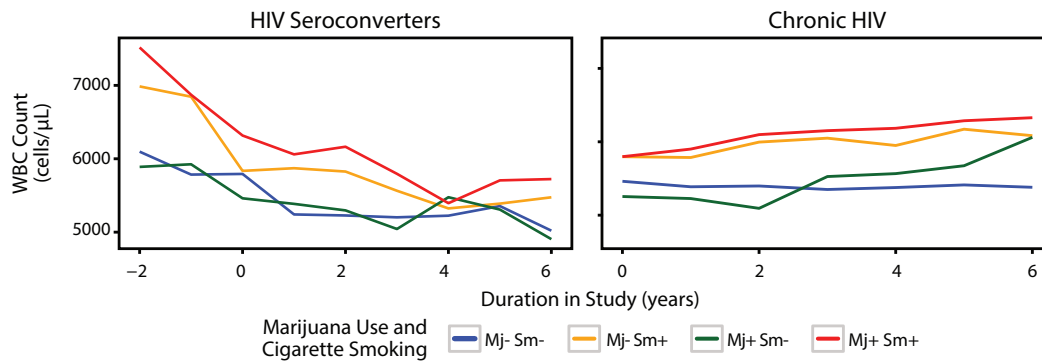

**Supplementary Figure 2. Mean white blood cell count values in the first six years of follow-up by marijuana use and cigarette smoking.** Mj+ denotes heavy marijuana users, Mj-, occasional or non-users, Sm+, moderate or heavy smokers ( $\geq 0.25$  packs/day, average), Sm-, light or non-smokers. Abbreviations: HIV, Human Immunodeficiency Virus; Mj, marijuana; Sm, smoking; WBC, white blood cells.
