# Supplementary material for: Marijuana Use Impacts Midlife Cardiovascular Events in HIV-Infected Men
Source: PubMed Central journal article supplement — Clin Infect Dis. 2017 Apr 25;65(4):626–35. doi: 10.1093/cid/cix391 (PMC5850013; doi:10.1093/cid/cix391), 2017-04-25
Supplement: cix391_suppl_85344_supplemental_figure_3.pdf [file cix391_suppl_85344_supplemental_figure_3.pdf]

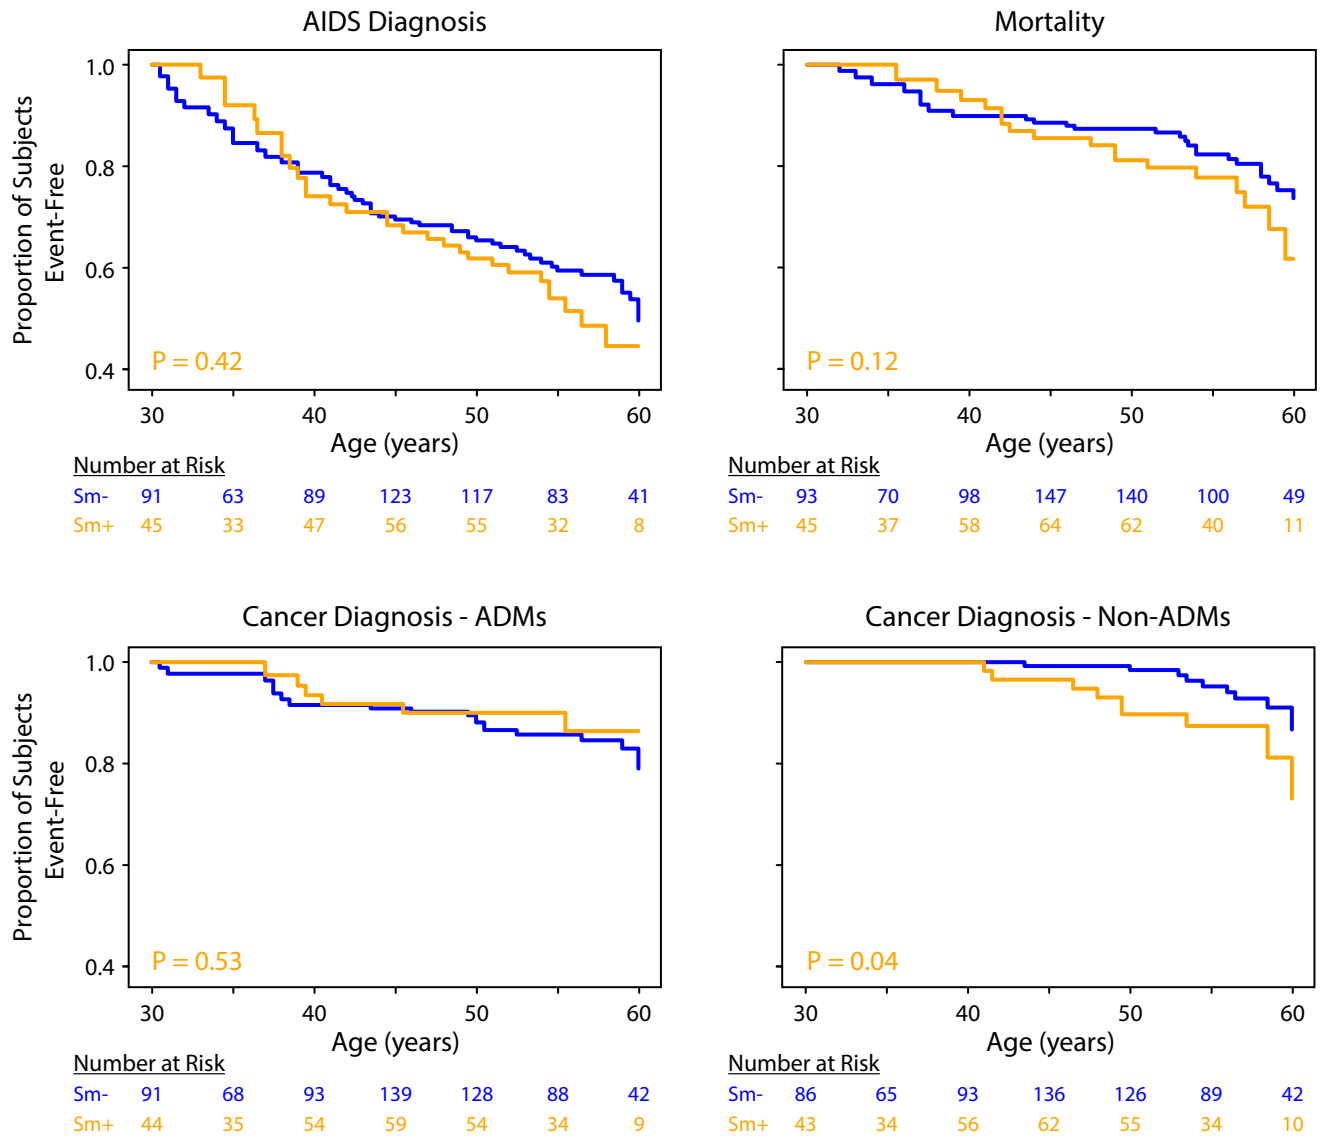

**Supplementary Figure 3. Kaplan-Meier curves of health outcomes in the merged HIV+ cohort stratified by cigarette smoking.** Survival curves by age for AIDS diagnosis, mortality, AIDS-defining malignancy (ADM) diagnosis (Kaposi sarcoma or Non-Hodgkin lymphoma), or non-ADM diagnosis, for the merged cohort stratified by cigarette smoking. Subjects with ADMs were excluded from analysis of non-ADM and vice versa. Sm+ denotes moderate or heavy smokers ( $\geq 0.25$  packs/day, average), Sm-, light or non-smokers, P values, pair-wise log-rank test vs. control group. Abbreviations: ADM, AIDS-defining malignancy; HIV, Human Immunodeficiency Virus; Sm, smoking.
