# Supplementary material for: Marijuana Use Impacts Midlife Cardiovascular Events in HIV-Infected Men
Source: PubMed Central journal article supplement — Clin Infect Dis. 2017 Apr 25;65(4):626–35. doi: 10.1093/cid/cix391 (PMC5850013; doi:10.1093/cid/cix391), 2017-04-25
Supplement: cix391_suppl_85344r1_supplemental_tables.pdf [file cix391_suppl_85344r1_supplemental_tables.pdf]

**Supplementary Table 1. Antiretroviral Medication Regimen by Marijuana Use.**

|                     | HIV Seroconverters |                             |                                |                                  |                                | Chronic HIV        |                             |                                |                                  |                                |
|---------------------|--------------------|-----------------------------|--------------------------------|----------------------------------|--------------------------------|--------------------|-----------------------------|--------------------------------|----------------------------------|--------------------------------|
|                     | Non-users<br>n (%) | Heavy<br>Marijuana<br>n (%) | <i>P</i><br>Value <sup>a</sup> | Occasional<br>Marijuana<br>n (%) | <i>P</i><br>Value <sup>a</sup> | Non-users<br>n (%) | Heavy<br>Marijuana<br>n (%) | <i>P</i><br>Value <sup>a</sup> | Occasional<br>Marijuana<br>n (%) | <i>P</i><br>Value <sup>a</sup> |
| <b>Baseline</b>     |                    |                             |                                |                                  |                                |                    |                             |                                |                                  |                                |
| Zidovudine (AZT)    | 37<br>(46.2)       | 12<br>(44.4)                | 1.00                           | 18<br>(56.2)                     | 0.405                          | 97<br>(39.8)       | 32<br>(49.2)                | 0.203                          | 32<br>(47.8)                     | 0.264                          |
| ddI, d4T, ddC       | 22<br>(27.5)       | 4<br>(14.8)                 | 0.208                          | 13<br>(40.6)                     | 0.185                          | 77<br>(31.6)       | 19<br>(29.2)                | 0.765                          | 22<br>(32.8)                     | 0.883                          |
| Protease Inhibitor  | 24<br>(30.0)       | 6<br>(22.2)                 | 0.621                          | 7<br>(21.9)                      | 0.486                          | 122<br>(50.0)      | 22<br>(33.8)                | 0.025                          | 40<br>(59.7)                     | 0.170                          |
| Lamivudine (3TC)    | 26<br>(32.5)       | 12<br>(44.4)                | 0.352                          | 14<br>(43.8)                     | 0.282                          | 162<br>(66.4)      | 45<br>(69.2)                | 0.767                          | 54<br>(80.6)                     | 0.025                          |
| Abacavir            | 4 (5.0)            | 1 (3.7)                     | 0.999                          | 2 (6.2)                          | 0.999                          | 51<br>(20.9)       | 15<br>(23.1)                | 0.734                          | 14<br>(20.9)                     | 0.999                          |
| Efavirenz           | 14<br>(17.5)       | 9<br>(33.3)                 | 0.105                          | 6<br>(18.8)                      | 0.999                          | 82<br>(33.6)       | 31<br>(47.7)                | 0.043                          | 14<br>(20.9)                     | 0.052                          |
| <b>Time-updated</b> |                    |                             |                                |                                  |                                |                    |                             |                                |                                  |                                |
| Zidovudine (AZT)    | 14<br>(23.3)       | 4<br>(28.6)                 | 0.734                          | 2<br>(10.0)                      | 0.333                          | 24<br>(15.5)       | 7<br>(17.5)                 | 0.809                          | 10<br>(19.2)                     | 0.522                          |
| ddI, d4T, ddC       | 9 (15.0)           | 3<br>(21.4)                 | 0.687                          | 1 (5.0)                          | 0.437                          | 5 (3.2)            | 2 (5.0)                     | 0.634                          | 5 (9.6)                          | 0.126                          |
| Protease Inhibitor  | 28<br>(46.7)       | 5<br>(35.7)                 | 0.557                          | 8<br>(40.0)                      | 0.796                          | 62<br>(40.0)       | 18<br>(45.0)                | 0.592                          | 23<br>(44.2)                     | 0.627                          |
| Lamivudine (3TC)    | 23<br>(38.3)       | 4<br>(28.6)                 | 0.555                          | 4<br>(20.0)                      | 0.176                          | 43<br>(27.7)       | 12<br>(30.0)                | 0.844                          | 19<br>(36.5)                     | 0.294                          |
| Abacavir            | 11<br>(18.3)       | 1 (7.1)                     | 0.442                          | 3<br>(15.0)                      | 0.999                          | 26<br>(16.8)       | 7<br>(17.5)                 | 0.999                          | 8<br>(15.4)                      | 0.999                          |
| Efavirenz           | 17<br>(28.3)       | 5<br>(35.7)                 | 0.746                          | 9<br>(45.0)                      | 0.181                          | 66<br>(42.6)       | 19<br>(47.5)                | 0.596                          | 21<br>(40.4)                     | 0.871                          |

Self-reported ART medication use. Baseline denotes first ART visit post-seroconversion or baseline visit for HIV seroconverter and chronic HIV cohorts, respectively. Time-updated denotes first incident cardiovascular event after age 40, loss to follow-up, last visit in 2010, or age 60.

Abbreviations: ART, antiretroviral therapy, ddI, didanosine, d4T, Stavudine, ddC, Zalcitabine (dideoxycytidine), HIV, human immunodeficiency virus.

a - Fisher's Exact Test vs. control group.

**Supplementary Table 2. Effect of Marijuana Use on HIV Disease Marker Trajectories.**

|                                               | HIV Viral Load<br>(copies/mL, log <sub>10</sub> ) |       |          | CD4 Count<br>(cells/μL, log <sub>2</sub> ) |       |          | CD8 Count<br>(cells/μL, log <sub>2</sub> ) |       |          | CD4:CD8 Ratio<br>(log <sub>2</sub> ) |       |          |
|-----------------------------------------------|---------------------------------------------------|-------|----------|--------------------------------------------|-------|----------|--------------------------------------------|-------|----------|--------------------------------------|-------|----------|
|                                               | Estimate                                          | SE    | P Value  | Estimate                                   | SE    | P Value  | Estimate                                   | SE    | P Value  | Estimate                             | SE    | P Value  |
| <b>HIV Seroconverters</b>                     |                                                   |       |          |                                            |       |          |                                            |       |          |                                      |       |          |
| Intercept                                     | 4.507                                             | 0.409 | < 0.0001 | 9.169                                      | 0.242 | < 0.0001 | 9.999                                      | 0.191 | < 0.0001 | -0.846                               | 0.276 | < 0.001  |
| Years in study                                | -0.241                                            | 0.032 | < 0.0001 | -0.130                                     | 0.022 | < 0.0001 | -0.019                                     | 0.012 | 0.119    | -0.108                               | 0.020 | < 0.0001 |
| Marijuana use                                 |                                                   |       |          |                                            |       |          |                                            |       |          |                                      |       |          |
| Daily                                         | -0.049                                            | 0.074 | 0.858    | 0.264                                      | 0.171 | 0.124    | 0.143                                      | 0.136 | 0.291    | 0.145                                | 0.195 | 0.457    |
| Weekly                                        | 0.050                                             | 0.038 | 0.835    | 0.105                                      | 0.050 | 0.484    | 0.137                                      | 0.118 | 0.247    | -0.012                               | 0.070 | 0.945    |
| Occasional                                    | -0.042                                            | 0.084 | 0.819    | -0.023                                     | 0.12  | 0.839    | -0.061                                     | 0.088 | 0.488    | 0.049                                | 0.127 | 0.700    |
| Moderate/heavy cigarette smoking <sup>a</sup> | 0.079                                             | 0.165 | 0.632    | 0.032                                      | 0.100 | 0.750    | 0.009                                      | 0.079 | 0.911    | 0.007                                | 0.114 | 0.950    |
| Age at baseline                               | -0.009                                            | 0.009 | 0.313    | 0.001                                      | 0.005 | 0.913    | -0.008                                     | 0.004 | 0.071    | 0.009                                | 0.006 | 0.134    |
| Race                                          |                                                   |       |          |                                            |       |          |                                            |       |          |                                      |       |          |
| Black                                         | -0.074                                            | 0.17  | 0.732    | -0.170                                     | 0.135 | 0.208    | -0.178                                     | 0.107 | 0.098    | 0.021                                | 0.154 | 0.891    |
| Other                                         | 0.081                                             | 0.301 | 0.787    | 0.399                                      | 0.089 | 0.036    | 0.271                                      | 0.049 | 0.072    | 0.198                                | 0.15  | 0.357    |
| Education > 12 years                          | 0.021                                             | 0.218 | 0.924    | 0.053                                      | 0.131 | 0.687    | -0.028                                     | 0.103 | 0.787    | 0.043                                | 0.149 | 0.771    |
| <b>Chronic HIV</b>                            |                                                   |       |          |                                            |       |          |                                            |       |          |                                      |       |          |
| Intercept                                     | 1.951                                             | 0.159 | < 0.0001 | 9.308                                      | 0.147 | < 0.0001 | 9.534                                      | 0.160 | < 0.0001 | -0.231                               | 0.192 | 0.227    |
| Years in study                                | 0.056                                             | 0.011 | < 0.0001 | 0.010                                      | 0.009 | 0.262    | -0.021                                     | 0.005 | 0.0001   | 0.031                                | 0.009 | 0.001    |
| Marijuana use                                 |                                                   |       |          |                                            |       |          |                                            |       |          |                                      |       |          |
| Daily                                         | 0.074                                             | 0.094 | 0.432    | -0.170                                     | 0.087 | 0.051    | 0.160                                      | 0.094 | 0.091    | -0.300                               | 0.113 | 0.009    |
| Weekly                                        | 0.048                                             | 0.112 | 0.667    | -0.116                                     | 0.04  | 0.267    | 0.042                                      | 0.13  | 0.711    | -0.121                               | 0.036 | 0.373    |
| Occasional                                    | 0.062                                             | 0.075 | 0.408    | 0.009                                      | 0.069 | 0.897    | 0.161                                      | 0.075 | 0.031    | -0.169                               | 0.089 | 0.060    |
| Age at baseline                               | 0.036                                             | 0.061 | 0.560    | 0.062                                      | 0.057 | 0.276    | -0.070                                     | 0.062 | 0.256    | 0.112                                | 0.074 | 0.132    |
| Moderate/heavy cigarette smoking <sup>a</sup> | -0.006                                            | 0.003 | 0.105    | -0.003                                     | 0.003 | 0.345    | 0.006                                      | 0.003 | 0.060    | -0.009                               | 0.004 | 0.024    |
| Race                                          |                                                   |       |          |                                            |       |          |                                            |       |          |                                      |       |          |
| Black                                         | 0.123                                             | 0.068 | 0.070    | -0.107                                     | 0.063 | 0.091    | -0.090                                     | 0.068 | 0.188    | -0.027                               | 0.082 | 0.746    |
| Other                                         | 0.037                                             | 0.081 | 0.652    | 0.073                                      | 0.075 | 0.328    | 0.093                                      | 0.081 | 0.255    | 0.002                                | 0.097 | 0.982    |
| Education > 12 years                          | 0.054                                             | 0.069 | 0.430    | 0.060                                      | 0.064 | 0.349    | -0.019                                     | 0.069 | 0.788    | 0.078                                | 0.083 | 0.346    |

Mixed effects model estimates for post-baseline follow-up, years 0 - 7. Models included a random intercept and slope for each subject.

a - Average ≥ 0.25 packs/day during study period.

Abbreviations: HIV, human immunodeficiency virus; SE, standard error.

**Supplementary Table 3. Effect of Marijuana Use and Cigarette Smoking on White Blood Cell and Neutrophil Count Trajectories.**

|                                                    | WBC count (cells/ $\mu$ L) ( $\log_2$ ) |       |          |                  |       |          | Neutrophil count (cells/ $\mu$ L) ( $\log_2$ ) |       |          |                  |       |          |
|----------------------------------------------------|-----------------------------------------|-------|----------|------------------|-------|----------|------------------------------------------------|-------|----------|------------------|-------|----------|
|                                                    | Adjusted Model 1                        |       |          | Adjusted Model 2 |       |          | Adjusted Model 1                               |       |          | Adjusted Model 2 |       |          |
|                                                    | Estimate                                | SE    | P Value  | Estimate         | SE    | P Value  | Estimate                                       | SE    | P Value  | Estimate         | SE    | P Value  |
| Intercept                                          | 12.611                                  | 0.181 | < 0.0001 | 12.595           | 0.181 | < 0.0001 | 11.530                                         | 0.069 | < 0.0001 | 11.51            | 0.071 | < 0.0001 |
| Heavy marijuana use                                | -0.121                                  | 0.062 | 0.051    |                  |       |          | -0.102                                         | 0.083 | 0.221    |                  |       |          |
| Moderate/heavy cigarette smoking                   | 0.153                                   | 0.037 | < 0.0001 |                  |       |          | 0.262                                          | 0.048 | < 0.0001 |                  |       |          |
| Stratified marijuana use & cigarette smoking       |                                         |       |          |                  |       |          |                                                |       |          |                  |       |          |
| Mj- Sm+                                            |                                         |       |          | 0.199            | 0.055 | < 0.001  |                                                |       |          | 0.359            | 0.074 | < 0.0001 |
| Mj+ Sm-                                            |                                         |       |          | -0.076           | 0.089 | 0.393    |                                                |       |          | -0.070           | 0.120 | 0.559    |
| Mj+ Sm+                                            |                                         |       |          | 0.023            | 0.080 | 0.773    |                                                |       |          | 0.190            | 0.107 | 0.078    |
| Age <sup>a</sup>                                   | -0.005                                  | 0.002 | 0.042    | -0.004           | 0.003 | 0.173    | 0.004                                          | 0.003 | 0.192    | 0.007            | 0.004 | 0.061    |
| Age at first visit                                 | -0.003                                  | 0.004 | 0.539    | -0.002           | 0.004 | 0.546    | -0.0011                                        | 0.005 | 0.035    | -0.011           | 0.005 | 0.035    |
| Race                                               |                                         |       |          |                  |       |          |                                                |       |          |                  |       |          |
| Black                                              | -0.199                                  | 0.043 | < 0.0001 | -0.203           | 0.043 | < 0.0001 | -0.310                                         | 0.056 | < 0.0001 | -0.316           | 0.056 | < 0.0001 |
| Other                                              | -0.031                                  | 0.054 | 0.560    | -0.029           | 0.054 | 0.592    | -0.003                                         | 0.071 | 0.969    | 0.002            | 0.071 | 0.979    |
| Education > 12 years                               | -0.040                                  | 0.046 | 0.386    | -0.037           | 0.046 | 0.415    | -0.054                                         | 0.060 | 0.374    | -0.050           | 0.060 | 0.409    |
| Total cholesterol (mg/dL)                          |                                         |       |          |                  |       |          |                                                |       |          |                  |       |          |
| 180-229                                            | 0.022                                   | 0.010 | 0.027    | 0.022            | 0.010 | 0.028    | 0.007                                          | 0.016 | 0.649    | 0.007            | 0.016 | 0.669    |
| $\geq$ 230                                         | 0.030                                   | 0.013 | 0.024    | 0.030            | 0.013 | 0.024    | -0.003                                         | 0.021 | 0.899    | -0.003           | 0.021 | 0.901    |
| HIV viral load $\geq$ 400 copies/mL                | -0.123                                  | 0.013 | < 0.0001 | -0.123           | 0.013 | < 0.0001 | -0.183                                         | 0.02  | < 0.0001 | -0.183           | 0.020 | < 0.0001 |
| Age * marijuana use                                | 0.02                                    | 0.006 | < 0.0001 |                  |       |          | 0.021                                          | 0.007 | 0.004    |                  |       |          |
| Age * Stratified marijuana use & cigarette smoking |                                         |       |          |                  |       |          |                                                |       |          |                  |       |          |
| Age * Mj- Sm+                                      |                                         |       |          | -0.004           | 0.005 | 0.405    |                                                |       |          | -0.010           | 0.007 | 0.140    |
| Age * Mj+ Sm-                                      |                                         |       |          | 0.019            | 0.008 | 0.012    |                                                |       |          | 0.024            | 0.010 | 0.017    |
| Age * Mj+ Sm+                                      |                                         |       |          | 0.018            | 0.008 | 0.020    |                                                |       |          | 0.013            | 0.010 | 0.205    |

Mixed effects model estimates with  $\log_2$ -transformed WBC and neutrophil count as the dependent variables for the merged HIV+ cohort with follow-up between ages 40-60. Models included a random intercept and slope for each subject. \* indicates interaction. Mj+ denotes heavy marijuana users, Mj-, occasional or non-users, Sm+, moderate or heavy smokers ( $\geq$  0.25 packs/day, average), Sm-, light or non-smokers.

Abbreviations: HIV, human immunodeficiency virus; Mj, marijuana; SE, standard error; Sm, smoking; WBC, white blood cells

a - Time-varying covariate, centered at age 40.

**Supplementary Table 4. Baseline and Updated Characteristics of the Merged HIV+ Cohort.**

|                                               | Non- and Occasional<br>Marijuana Use<br>(n=343) | Heavy<br>Marijuana Use<br>(n=71) | P Value <sup>a</sup> |
|-----------------------------------------------|-------------------------------------------------|----------------------------------|----------------------|
| Cohort                                        |                                                 |                                  | 0.840                |
| HIV Seroconverters                            | 104 (30.3)                                      | 23 (32.4)                        |                      |
| Chronic HIV                                   | 239 (69.7)                                      | 48 (67.6)                        |                      |
| Length of follow-up, mean (SD), years         | 6.38 (3.75)                                     | 6.07 (3.95)                      | 0.536                |
| Baseline age, median (IQR)                    | 41.5 (40.0-45.5)                                | 41.0 (40.0-47.2)                 | 0.756                |
| Endpoint age, median (IQR)                    | 50.0 (45.8-54.6)                                | 47.0 (44.0-54.0)                 | 0.005                |
| Racial/ethnic group                           |                                                 |                                  | 0.510                |
| White                                         | 230 (67.1)                                      | 44 (62.0)                        |                      |
| Black                                         | 66 (19.2)                                       | 18 (25.4)                        |                      |
| Other                                         | 47 (13.7)                                       | 9 (12.7)                         |                      |
| Education > 12 years                          | 279 (81.3)                                      | 58 (81.7)                        | 0.999                |
| Heavy/binge alcohol use <sup>b</sup>          | 79 (23.0)                                       | 19 (26.8)                        | 0.600                |
| Moderate/heavy cigarette smoking <sup>c</sup> | 104 (30.3)                                      | 38 (53.5)                        | <0.001               |
| Hypercholesterolemia risk factor <sup>d</sup> | 125 (36.4)                                      | 21 (29.6)                        | 0.334                |
| Diabetes risk factor <sup>e</sup>             | 24 (7.0)                                        | 1 (1.4)                          | 0.127                |
| Hypertension risk factor <sup>f</sup>         | 138 (40.2)                                      | 25 (35.2)                        | 0.513                |
| Statin use <sup>g</sup>                       | 87 (25.4)                                       | 17 (23.9)                        | 0.920                |
| BMI (kg/m <sup>2</sup> ), mean (SD)           | 26.2 (3.9)                                      | 25.4 (4.7)                       | 0.136                |
| Hemoglobin (gm/dL), mean (SD)                 | 14.8 (1.4)                                      | 14.7 (1.5)                       | 0.571                |
| Platelet count (1,000 cells/μL), median (IQR) | 215 (180-244)                                   | 225 (185-259)                    | 0.312                |
| CD4 count (cells/μL), mean (SD)               | 637 (288)                                       | 715 (341)                        | 0.045                |
| HIV viral load ≥ 400 copies/mL                | 54 (16.9)                                       | 14 (21.2)                        | 0.510                |
| ART adherence at ≥ 95% of visits <sup>h</sup> | 226 (67.3)                                      | 47 (68.1)                        | 0.999                |
| One or more cardiovascular events             | 30 (8.7)                                        | 14 (19.7)                        | 0.012                |

Data are n (%) unless otherwise specified at first incident cardiovascular event after age 40, loss to follow-up, last visit in 2010, or age 60.

Abbreviations: BMI, body mass index; HIV, human immunodeficiency virus; IQR, interquartile range; SD, standard deviation.

a - Chi-Squared, ANOVA, or Kruskal-Wallis Rank Sum Test, for categorical, normally-distributed continuous, and non-normally distributed continuous variables, respectively.

b - Highest use at ≥ 2 visits: Heavy, > 14 drinks/week; Binge, 5 or more drinks/occasion at least monthly.

c - Average ≥ 0.25 packs/day in 10 years prior to endpoint.

d - Mean total cholesterol at two most recent visits > 240, or use of cholesterol-lowering medications for at least one year in the 10 years prior to endpoint.

e - Mean total HgA1c at two most recent visits ≥ 6.5%, or use of diabetes medications for at least one year in the 10 years prior to endpoint.

f - Mean total systolic blood pressure > 140 or diastolic blood pressure > 90 at two most recent visits, or use of antihypertensive medications for at least one year in the 10 years prior to endpoint.

g - Reported use for one year or more in the 5 years prior to endpoint.

h - Adherence at visits once ART initiated.

**Supplementary Table 5. Association between Cardiovascular Events and Additional Risk Factors.**

| Predictor                                             | Cardiovascular Events     |                       | Unadjusted Models |         |
|-------------------------------------------------------|---------------------------|-----------------------|-------------------|---------|
|                                                       | Controls (n=370)<br>n (%) | Cases (n=44)<br>n (%) | OR (95% CI)       | P Value |
| Hypercholesterolemia risk factor <sup>a</sup>         |                           |                       |                   |         |
| No                                                    | 242 (65.4)                | 26 (59.1)             | 1.00 (Ref.)       | --      |
| Yes                                                   | 128 (34.6)                | 18 (41.9)             | 1.31 (0.69, 2.48) | 0.408   |
| Diabetes risk factor <sup>b</sup>                     |                           |                       |                   |         |
| No                                                    | 351 (94.9)                | 38 (86.4)             | 1.00 (Ref.)       | --      |
| Yes                                                   | 19 (5.1)                  | 6 (13.6)              | 2.92 (1.1, 7.75)  | 0.032   |
| Hypertension risk factor <sup>c</sup>                 |                           |                       |                   |         |
| No                                                    | 228 (61.6)                | 23 (52.3)             | 1.00 (Ref.)       | --      |
| Yes                                                   | 142 (38.4)                | 21 (47.7)             | 1.47 (0.78, 2.75) | 0.232   |
| Statin use <sup>d</sup>                               |                           |                       |                   |         |
| No                                                    | 278 (75.1)                | 32 (72.7)             | 1.00 (Ref.)       | --      |
| Yes                                                   | 92 (24.9)                 | 12 (27.3)             | 1.13 (0.56, 2.29) | 0.728   |
| BMI (kg/m <sup>2</sup> ), mean (SD)                   | 25.9 (4.0)                | 26.4 (4.9)            | 1.03 (0.95, 1.11) | 0.485   |
| CD4 count (cells/μL), mean (SD) <sup>e</sup>          | 643.7 (296.8)             | 705.8 (311.3)         | 1.07 (0.97, 1.18) | 0.190   |
| Hemoglobin (gm/dL), mean (SD)                         | 14.7 (1.4)                | 14.7 (1.2)            | 0.99 (0.78, 12.5) | 0.922   |
| Platelets (1,000 cells/μL), median (IQR) <sup>e</sup> | 213 (179-244)             | 235 (198-276)         | 1.07 (1.02, 1.12) | 0.004   |

Time-updated values from the merged HIV+ cohort at first incident cardiovascular event after age 40, loss to follow-up, last visit in 2010, or age 60. Models were fit using logistic regression.

Abbreviations: BMI, body mass index; CI, confidence interval; OR, odds ratio; SD, standard deviation.

a - Mean total cholesterol at two most recent visits > 240, or use of cholesterol-lowering medications for at least one year in the 10 years prior to endpoint.

b - Mean total HgA1c at two most recent visits ≥ 6.5%, or use of diabetes medications for at least one year in the 10 years prior to endpoint.

c - Mean total systolic blood pressure > 140 or diastolic blood pressure > 90 at two most recent visits, or use of antihypertensive medications for at least one year in the 10 years prior to endpoint.

d - Reported use for one year or more in the 5 years prior to endpoint.

e - CD4 and platelet count model estimates expressed as increase in odds per 100 cells/μL and 10,000 cells/uL, respectively.
